# Supplementary material for: Electrospun catechol-modified poly(ethyleneglycol) nanofibrous mesh for anti-fouling properties
Source: Royal Society of Chemistry journal article supplement (doi:10.1039/c3tb20444h), 2013-01-01
Supplement: c3tb20444h.pdf [file c3tb20444h.pdf]

Supplementary Information

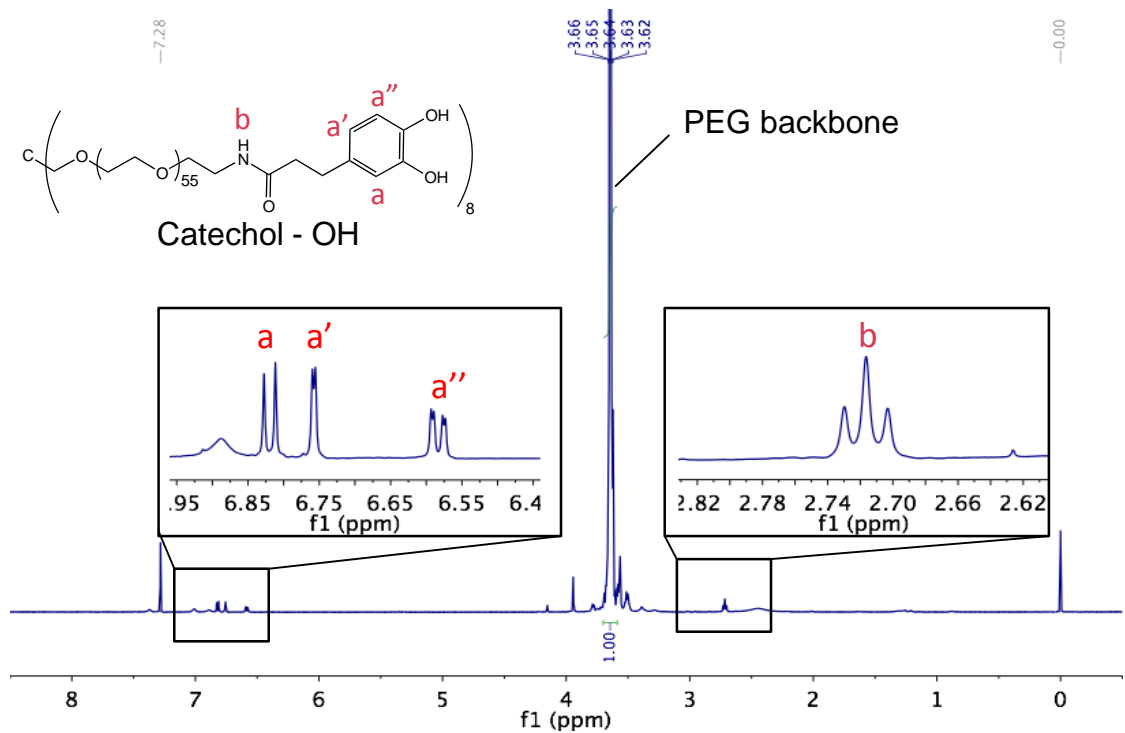

Figure S1. <sup>1</sup>H-NMR of catechol-modified 8-arm PEG.

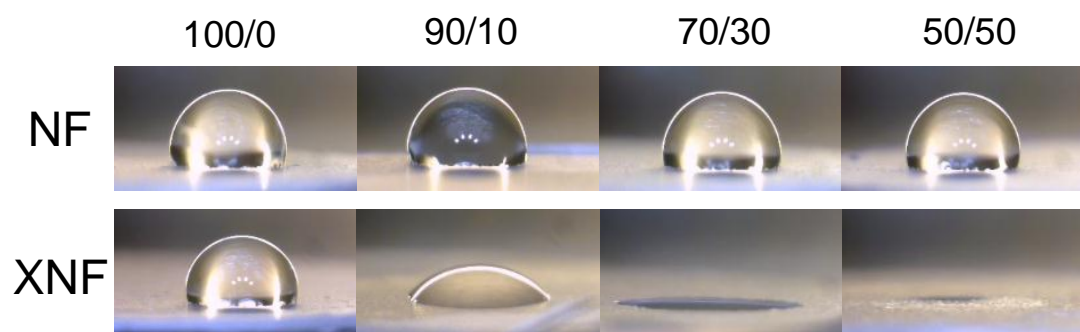

Figure S2. The image of water drop at 15s after a water droplet was touched the surface of the nanofibrous mesh.

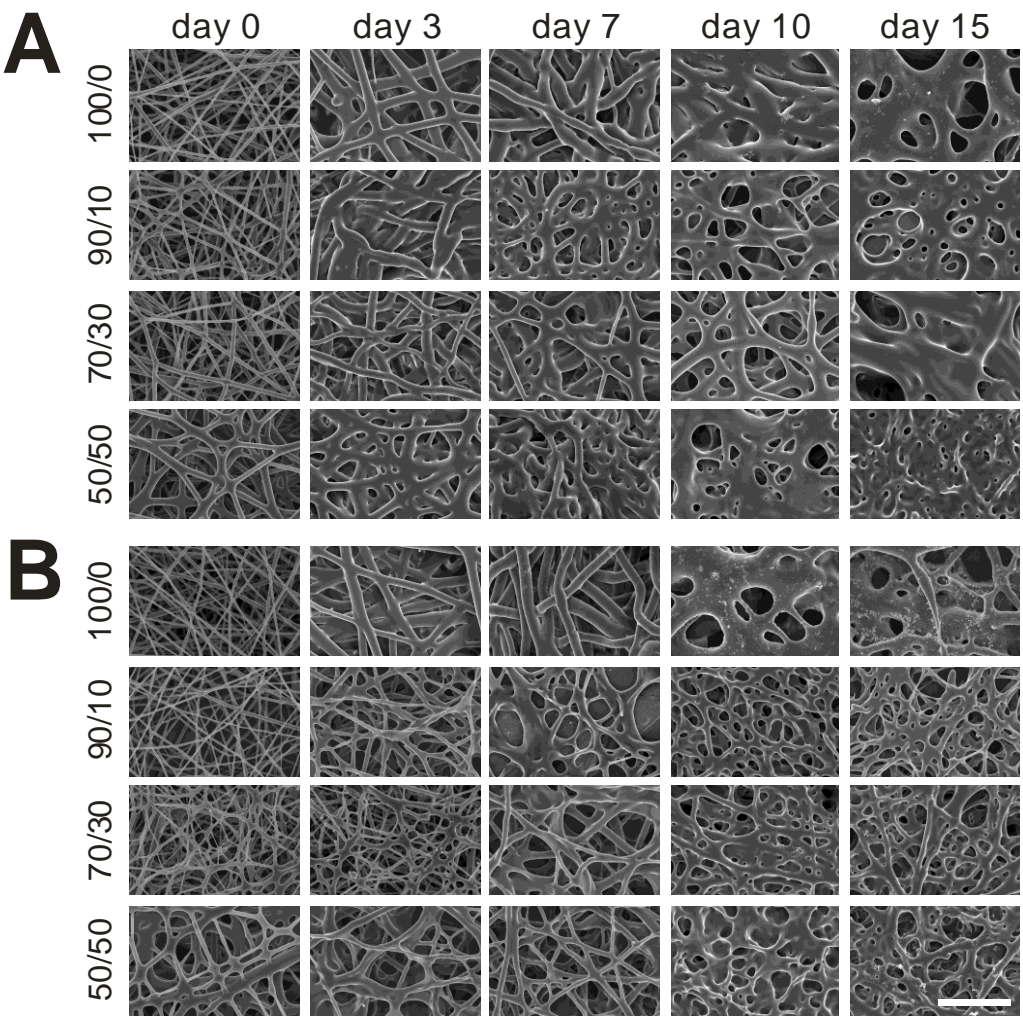

Figure S3. SEM images of the morphology of (A) non-crosslinked NF and (B) crosslinked NF at day 0, 3, 7, 10 and 15 after degradation (scale bar=10μm).

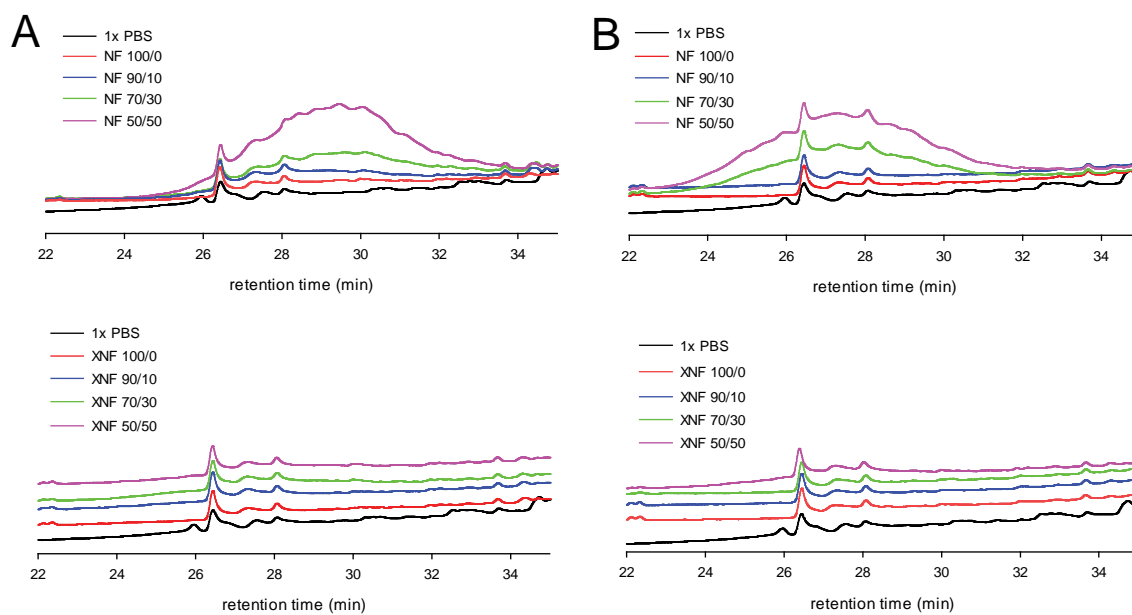

Figure S4. RP-HPLC results of the supernatant of the mass erosion at day 3 (A) and day 15 (B). NFs showed significant release out of 8cPEGa from the mesh while there was no sign of 8cPEGa in XNFs even at day 15.
